# Supplementary material for: An Atypical Mitochondrial Carrier That Mediates Drug Action in Trypanosoma brucei
Source: PubMed Central journal article supplement (PMC4422618; doi:10.1371/journal.ppat.1004875), 2015-05-06
Supplement: ppat.1004875.s001.pdf [file ppat.1004875.s001.pdf]

**S1 Table.** Oligonucleotides used in the study.

| <i>Primer number (name)</i>       | <i>Sequence</i>                              |
|-----------------------------------|----------------------------------------------|
| Primer 1 (TbMCP14-F)              | 5'- GCCCAAGCTTGGATCCGAGGGTCTTCGGGCTATTTA -3' |
| Primer 2 (TbMCP14-R)              | 5'- TGGCTCTAGACTCGAGCAGAAGCCCAGCGTAGAGAC -3' |
| Primer 3 (TbJPM140-F full-length) | 5'- ACGCAAGCTTATGAGTATCACCAACATCGCTG -3'     |
| Primer 4 (TbJPM140-R)             | 5'- CGCGGATCCTATTTGTTTCCAGAGTTCTCGGTC -3'    |
| Primer 5 (TbJPM140-F truncated)   | 5'- ACGCAAGCTTATGCTACGAACGTTGCTGCTG -3'      |
| Primer 6 (MCP14KO-5'_fw)          | 5'- CCCCTCGAGAACGGATTTATGGAGTTTATTTTTC -3'   |
| Primer 7 (MCP14KO-5'_rv)          | 5'- GCCCAAGCTTCTAACTTAATGTGAGGACGTC -3'      |
| Primer 8 (MCP14KO-3'_fw)          | 5'- TGGCTCTAGAAGGAGAAATGGTGTGGTACAC -3'      |
| Primer 9 (MCP14KO-3'_rv)          | 5'- CCCGCGCCGCTGGTGATTAAACCTCACTTTATC -3'    |
| Primer 10 (MCP14qPCR_fw)          | 5'- CGAAACCTCCATCCGTATTC -3'                 |
| Primer 11 (MCP14qPCR_rv)          | 5'- CCACGATAAATAGCCCGAAG -3'                 |
| Primer 12 (Splice leader)         | 5'- CGCTATTATTAGAACAGTTTCTGTAC -3'           |
