# Supplementary material for: An Atypical Mitochondrial Carrier That Mediates Drug Action in Trypanosoma brucei
Source: PubMed Central journal article supplement (PMC4422618; doi:10.1371/journal.ppat.1004875), 2015-05-06

**S3 Figure.** TbMCP14-dependent sensitivity of *T. brucei* bloodstream forms towards G25. Parasites cultured for three days in the absence (control) or presence (tet) of tetracycline to induce down-regulation (left panels) or over-expression (right panels) of TbMCP14 were treated with different concentrations of G25 for 24 h. Percentages of propidium iodide impermeable (PI-) or permeable (PI+) parasites are shown. Digitonin-permeabilized cells were used as a positive control of PI staining (PI+ area of histogram, see Materials and Methods). The results from one of two independent experiments are shown.

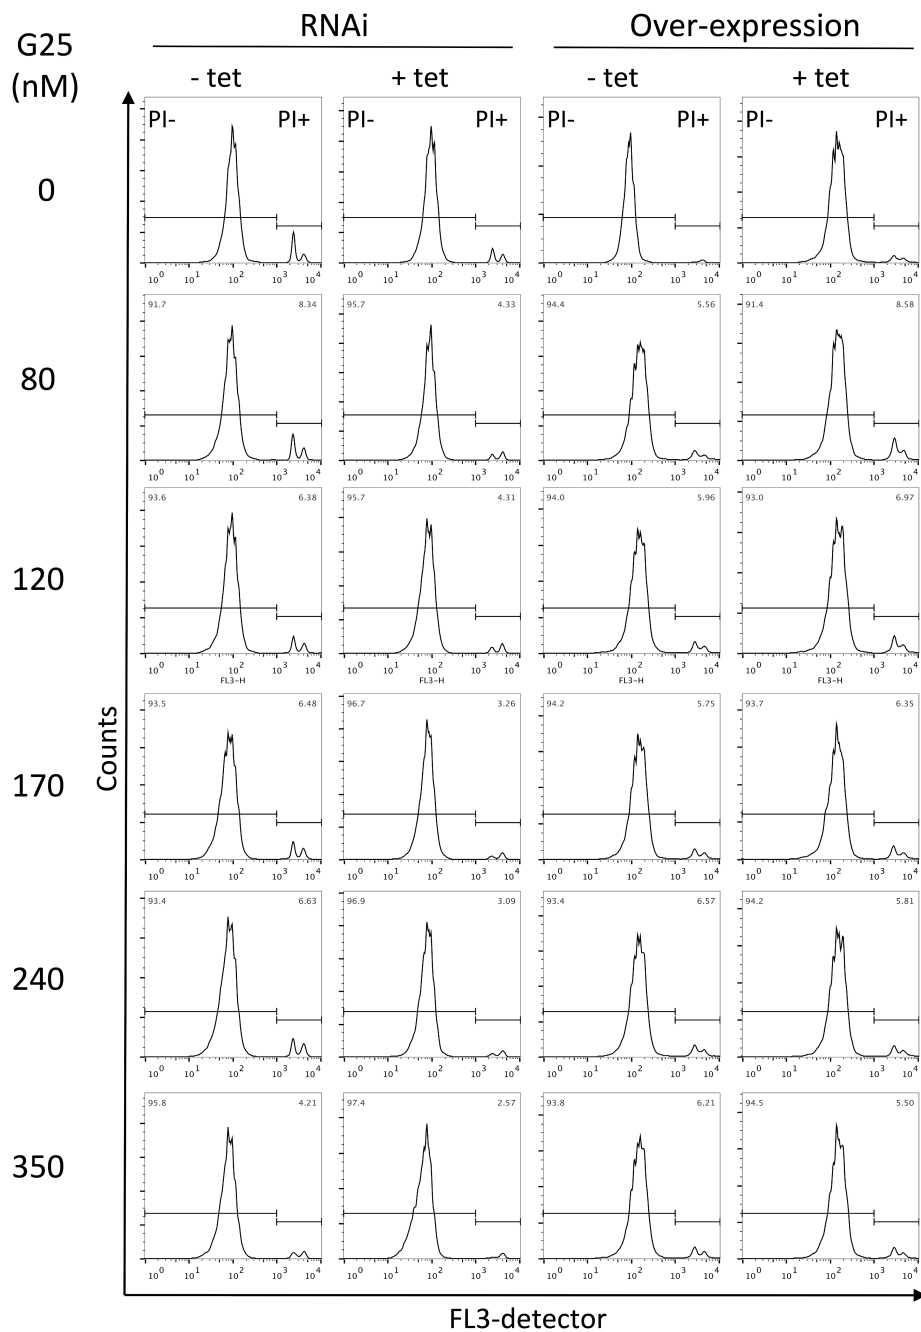

Supplement: ppat.1004875.s004.pdf [file ppat.1004875.s004.pdf]
